# Supplementary material for: Rats do not eat alone in public: Food-deprived rats socialize rather than competing for baits
Source: PLoS One. 2017 Mar 9;12(3):e0173302. doi: 10.1371/journal.pone.0173302 (PMC5344391; doi:10.1371/journal.pone.0173302)
Supplement: S1 File — (XLSX) [file pone.0173302.s002.xlsx]

## Sheet: object order -trio
Latency to first visit to each object (sec)
Data is shown for each rat in the triad and the lone trials. Mising values indicate that the rat did not reach that object in that trial.
		Triad #	1	1	1	1	2	2	2	2	3	3	3	3	4	4	4	4	5	5	5	5	6	6	6	6	7	7	7	7	8	8	8	8
		cage	1	2	3		1	2	3		4	5	6		4	5	6		7	8	9		7	8	9		10	11	12		10	11	12
Trial	Object #	color	Blue	Red	Green	pioneer	Blue	Red	Green	pioneer	Blue	Red	Green	pioneer	Blue	Red	Green	pioneer	Blue	Red	Green	pioneer	Blue	Red	Green	pioneer	Blue	Red	Green	pioneer	Blue	Red	Green	pioneer
Triad	1		567.2		698.2	567.2		442.4	590.2	442.4		595	890	595	831.2		373.6	373.6		728.6	-	728.6		573.4		573.4				0				0
Triad	2		564.4		696.2	564.4	566.4	440	584.2	440		588	888	588	825.4	753.6	358.4	358.4		423.4	489.4	423.4		251		251				0				0
Triad	3		339.2		664.2	339.2	442.4	438.2	428.4	428.4		584.6	257.4	257.4	822.4	391.2	334.4	334.4		406.2	473.8	406.2		248.2	313.8	248.2	194.6			194.6	770.8		757.6	757.6
Triad	4		336.2	736.4	528	336.2	440.6	435.8	422.4	422.4	271.2	279.6	247	247	810.2	388	324.6	324.6		401.8	469.4	401.8		243.4	246.8	243.4	190.6			190.6	768.6		754.8	754.8
Triad	5		333.2	621	350.2	333.2	439	431.6	328.4	328.4	269.6	276.4	207	207	746.4	384.8	321	321		399.2	410.6	399.2		241	244.4	241	169	721.6		169	508.8		521	508.8
Triad	6		317.8	618.4	346.6	317.8	437.2	327.6	325.2	325.2	264.6	250.8	203	203	392.8	250	316.8	250		395.2	407.6	395.2		207.8	207.8	207.8	166.6	719.8	472.2	166.6	504.8		516.2	504.8
Triad	7		316	615.2	345	316	434.2	198.8	322	198.8	242.2	244.4	198.6	198.6	391.2	247.4	314.2	247.4		390.2	404.8	390.2		203.6	203.6	203.6	157.2	297.6	469.6	157.2	501	797.8	513.8	501
Triad	8		314	613.6	317.8	314	158.8	165.2	319.8	158.8	239	241	196.2	196.2	390.2	245.2	295	245.2		275.2	401.6	275.2		200.6	202.4	200.6	151.4	295.2	346.4	151.4	498.8	787.2	493.8	493.8
Triad	9		302.2	310.4	313.6	302.2	153.8	151	151.8	151	230	220	192.6	192.6	246.8	243	291.8	243		271	399	271		194.4	199	194.4	148.6	277.6	335.6	148.6	493.8	784.4	472.6	472.6
Triad	10		298	306.6	311.8	298	150.8	149.2	150	149.2	206.2	172.8	179.8	172.8	242	237.2	270.6	237.2		267.2	395.8	267.2		89.8	197	89.8	143.6	212.2	299.6	143.6	486.4	546.6	470.2	470.2
Triad	11		284.2	286.8	283.8	283.8	146	146.8	148.4	146	202.2	166.8	176.8	166.8	192	182.6	253.2	182.6	443.6	260.6	389.8	260.6		86	50	50	140.8	208	297.2	140.8	481	542	465.4	465.4
Triad	12		261.4	172.2	170.8	170.8	131	144.8	128.6	128.6	199.2	162.8	174	162.8	186.2	175.8	250.6	175.8	330.4	248	362	248	273	84.2	48.2	48.2	125.4	205.4	294.6	125.4	408.4	475.6	457.4	408.4
Triad	13		257.8	170.2	168.6	168.6	105	96.6	95.8	95.8	196.4	154.8	171	154.8	184.6	173	186.8	173	326.4	111	115.2	111	242.2	48.4	44.8	44.8	22.4	202.6	285.8	22.4	405.2	331.4	454.2	331.4
Triad	14		174.8	168.6	166.2	166.2	103	95.4	93.6	93.6	193.6	127.6	129.8	127.6	156	142.2	182.6	142.2	324.4	108.6	113	108.6	235.4	42.2	43.4	42.2	19.2	196.8	281.8	19.2	398.8	328	417	328
Triad	15		172	166.6	164.6	164.6	101.6	94.2	90.8	90.8	128	123.2	126.6	123.2	151.6	139.8	180.6	139.8	102.4	105.6	110.2	102.4	226.4	37.6	37	37	16.4	184.6	187	16.4	384.8	325.6	414.2	325.6
Triad	16		103.4	101.6	100.4	100.4	95.2	90.6	88.8	88.8	118.8	117.8	113.2	113.2	145	63.6	67.4	63.6	24.4	101.2	106.2	24.4	190.4	3	2.4	2.4	13.4	129.2	126	13.4	217.2	170.2	161.4	161.4
Lone	1			445.6	411		230.8	480.6	330			477.6	717		528.8	143	655.6				556		191	182.2	94.2		860.6	450	566.6				392
Lone	2			439	260		171.8	478	327.8			473.8	668.4		122.8	139.6	640.8		536		407.6		180.2	178.8	82.2		853.8	196	555.8			444.6	340.4
Lone	3			398.2	257.4		169.4	319.8	288.4			329.2	186.4		113.2	136.8	253.4		531.4		404		174.4	175.6	79.8		611.8	177.2	517.4		486.4	439.6	247.6
Lone	4			396.4	246.4		162.4	317.4	181.6			320.6	183.2		110.4	133.2	178.8		301.4		400.8		169	173.2	76.6		608	159	514.4		477.8	427	245.2
Lone	5			394.2	244		160.2	179	175.2			309	154.2		106.8	125	174.6		236.8		304.8		160.4	157.4	69.4		575.6	155.6	352.2		458.4	422.8	167.2
Lone	6			390	238.8		157	173	173			298.8	150		104.4	107.6	168.6		232.4		302.4		157.6	155	67.4		570.4	153.4	349.6		433.6	420	163.8
Lone	7			344.4	231.6		154.2	142.4	170.8		547.4	279.4	131.6		101.6	104.6	150		185.6		174.2		110.4	152.6	54.8		297	111.6	324.6		425.6	411.2	159.8
Lone	8		368.2	342.2	176.4		137.6	120.6	133		541.8	276.4	125.6		93.8	102.2	145.4		180.2		171.4		104.2	129.6	51.6		294.2	109.6	320.6		421.2	360.8	156.4
Lone	9		365	338.6	172		134.2	117.8	130.6		534	272.4	117.4		88.8	89.8	120		100	694.2	166.2		86	126.8	49.2		270.4	107.2	318.2	334	331.4	356.8	137
Lone	10		242	330.6	169.4		119.4	99.4	128.4		163.6	228.2	110.8		86.6	75.6	115.8		96.6	549.4	120.4		82.6	102.6	47		268	60.8	249	327.2	322.6	353.2	134.2
Lone	11		230	262.6	164		109.8	96.2	111.2		160.2	217	107		69.2	73.2	110.4		90.4	492.2	117.8		77.4	99.4	43.8		261.6	54.8	245.2	321.8	320.2	325.2	132.2
Lone	12		228	259.4	153.2		108.2	92.8	97.6		138.4	213.4	103.4		59.2	63	104.4		85.6	487	115		74	97.4	42.2		258.4	52.8	241.8	318	313.8	319.8	128.2
Lone	13		173.8	254.8	104.8		94.4	50.8	95		51.4	203.8	83		56	59	101		83.4	479.4	62		22.8	54.2	32		47	30.4	235.6	165.6	251.8	301.6	51.2
Lone	14		170.4	40.4	100.2		90.6	47.4	55.4		40.6	189.4	79		53.4	50.8	97.4		79.4	464.6	56.6		19.8	51.6	29.2		42.8	26.8	231.8	158.8	249.2	289	48.4
Lone	15		166.8	31.2	96.8		88.4	43.2	32.4		37.8	186.4	74.4		47.4	45	70		76.8	330.2	53.8		17.6	49	27.4		39	24.8	229.2	153.4	243.8	161.4	45.4
Lone	16		140.4	22.8	60.6		73.2	28.4	29.4		21	103	69.8		16.8	21.2	62.8		34.2	226.2	50.4		7	47.2	14.6		36	21.8	214.8	119.2	233.4	145.8	39
